# Supplementary material
Source: PubMed Central journal article supplement (PMC5665546)
Supplement: bm7b00964_si_001.pdf [file bm7b00964_si_001.pdf]

## **Supporting Information**

# **A biomimetic stress sensitive hydrogel controlled by DNA nanoswitches**

*Swapneel R. Deshpande, Roel Hammink, Frank H.T. Nelissen, Alan E. Rowan, and Hans A. Heus\**

Institute for Molecules and Materials, Radboud University, Heyendaalseweg 135, 6525 AJ Nijmegen,  
the Netherlands

**Corresponding Author**

**E-mail: [h.heus@science.ru.nl](mailto:h.heus@science.ru.nl)**

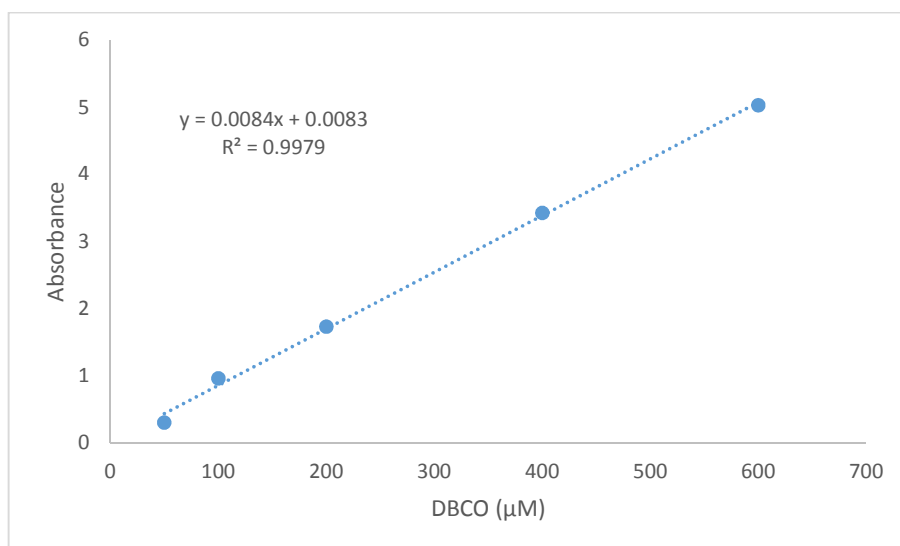

| Samples                 | [DNA-DBCO] at 0 mins<br>(Absorbance) | [DNA-DBCO] after 12<br>hours<br>(Absorbance) |
|-------------------------|--------------------------------------|----------------------------------------------|
| DNA A                   | ~100 μM (0.958)                      | ~ 4 μM (0.108)                               |
| DNA B                   | ~100 μM (0.860)                      | ~ 10 μM (0.112)                              |
| Control<br>PIC, no DBCO | ~ 5 μM (0.05)                        | ~ 5 μM (0.06)                                |

**Figure S1.** Yields of DBCO-DNA conjugation to N<sub>3</sub>-functionalized PIC polymers. A standard curve was generated by measuring the absorbance of free concentrations of DBCO at 309 nm using a Nanodrop spectrophotometer (ND-1000, Thermo Scientific). The amount of DNA-DBCO clicked on DNA A and DNA B was determined by the absorbance of residual free DNA-DBCO after the click reaction. Comparing the amount of free DBCO before (0 min) and after incubation (12 hours) with the polymer reveals a high reaction efficiency of ~90 - 95 % for both DNA A and B oligonucleotides.

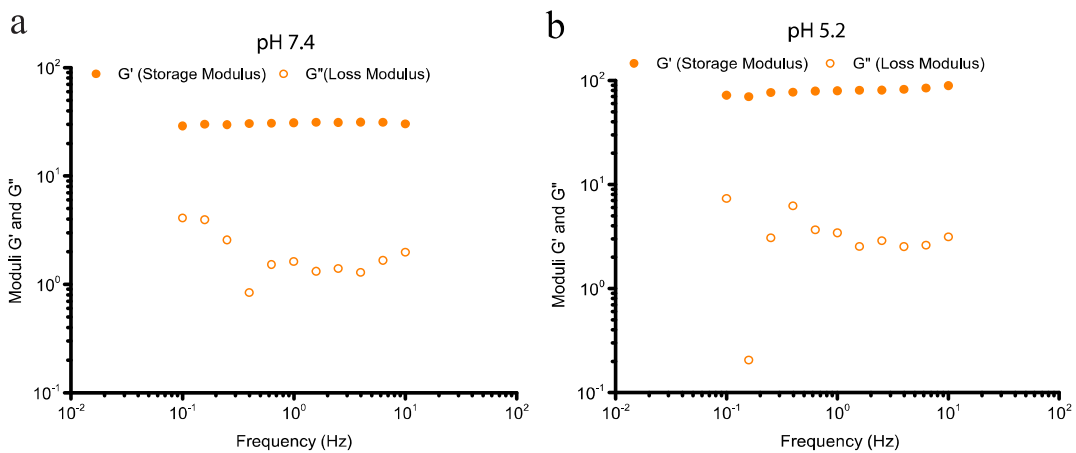

**Figure S2.** Frequency dependent rheology of PIC DNA hydrogels cross-linked with 0.9 equivalents DNA LC at pH 7.4 (a) or 5.2 (b). The hydrogels were stable and did not relax as demonstrated by measuring G' and G'' over a range of frequencies ( $10^{-3}$  to 10 Hz). All measurements were performed at 30 °C in PBS, 10 mM MgCl<sub>2</sub>, pH 7.4.

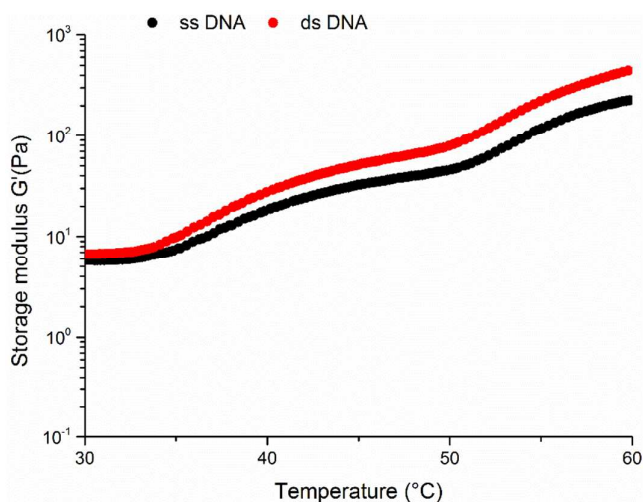

**Figure S3.** Temperature dependent rheological analysis of PIC-DNA hydrogel, covalently cross-linked with DNA AB (single-stranded) or DNA AB + C (double stranded). ( $1 \text{ }^\circ\text{C min}^{-1}$  at (1 Hz) and strain (2%) PBS, 10 mM MgCl<sub>2</sub>.)

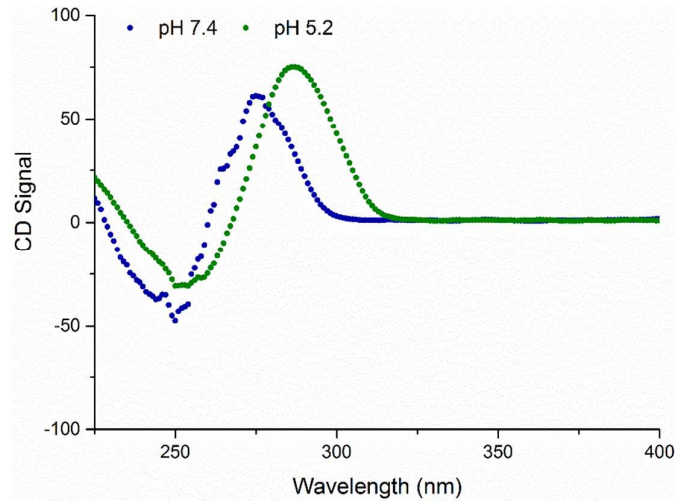

**Figure S4.** CD spectra to confirm formation of an i-motif in solution (25 °C, PBS.10 mM MgCl<sub>2</sub>). The spectrum of DNA LC shows a large positive peak at ~ 260 nm at pH 7.4 and a larger positive peak, shifted to ~ 285 nm at pH 5.2. Simultaneously, the small negative peak becomes smaller and shifts to higher wavelength. Both are indicators of a switch to an i-motif structure at low pH.

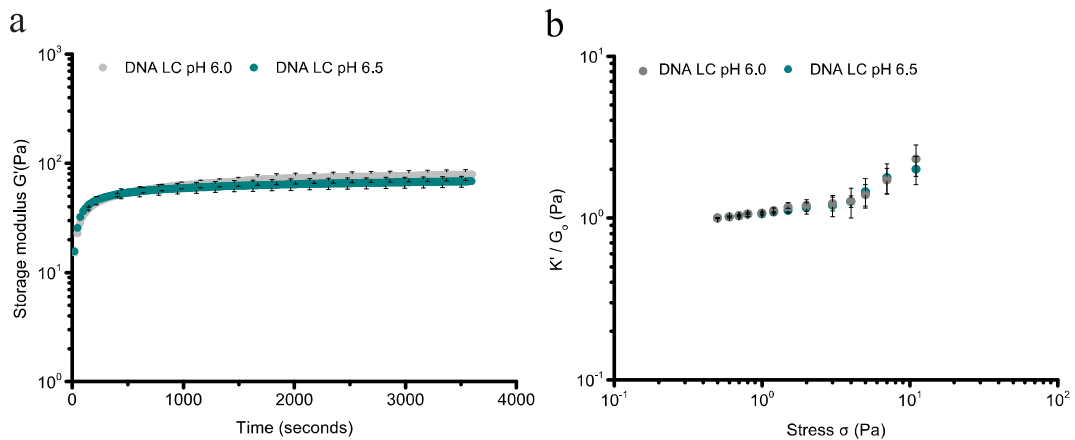

**Figure S5.** pH dependent rheological analysis of PIC-DNA cross-linked with 0.9 equivalents DNA LC to form the i-motif at 30 °C in PBS,  $10 \times 10^{-3}$  M MgCl<sub>2</sub>. a) Time evolution of storage modulus  $G'$  after addition of DNA cross-linker LC at pH 6.0 (grey) and pH 6.5 (green). b)  $K'/G_0$  as function of  $\sigma$  at pH 6.0 (grey) and pH 6.5 (green).

Table S1 Mechanical properties of hydrogel cross-linked with i-motif at pH 6.0 and 6.5

| DNA construct         |                     | Rheological properties |                 |                     |
|-----------------------|---------------------|------------------------|-----------------|---------------------|
| Cross-linker Sequence | Contour Length (nm) | $G_0$ (Pa)             | $\sigma_c$ (Pa) | $\sigma_{max}$ (Pa) |
| ss-DNA LC (pH 6.0)    | ~ 16 - 19           | $79 \pm 9$             | $4 \pm 0.5$     | 30                  |
| ss-DNA LC (pH 6.5)    | ~ 16 - 19           | $68.5 \pm 8$           | $4.5 \pm 0.5$   | 30                  |

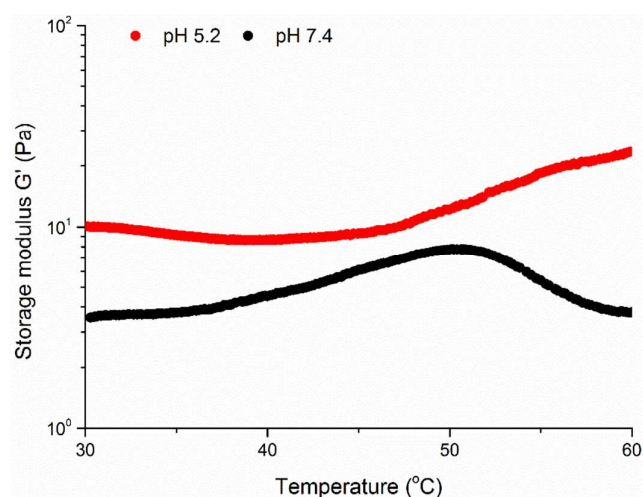

**Figure S6.** Rheological analysis of DNA triplex cross-linked PIC hydrogel at pH 7.4 and pH 5.2. Temperature dependent rheology was measured with ramping of  $1\text{ }^{\circ}\text{C min}^{-1}$  at (1 Hz) and strain (2%) PBS, 10 mM  $\text{MgCl}_2$ .

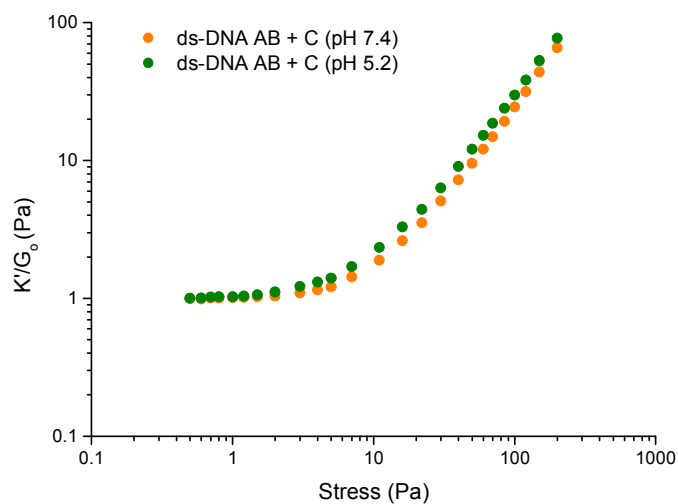

**Figure S7.** pH dependence of PIC DNA hydrogels covalently cross-linked with DNA AB + C at pH 7.4 (orange) and 5.2 (green).

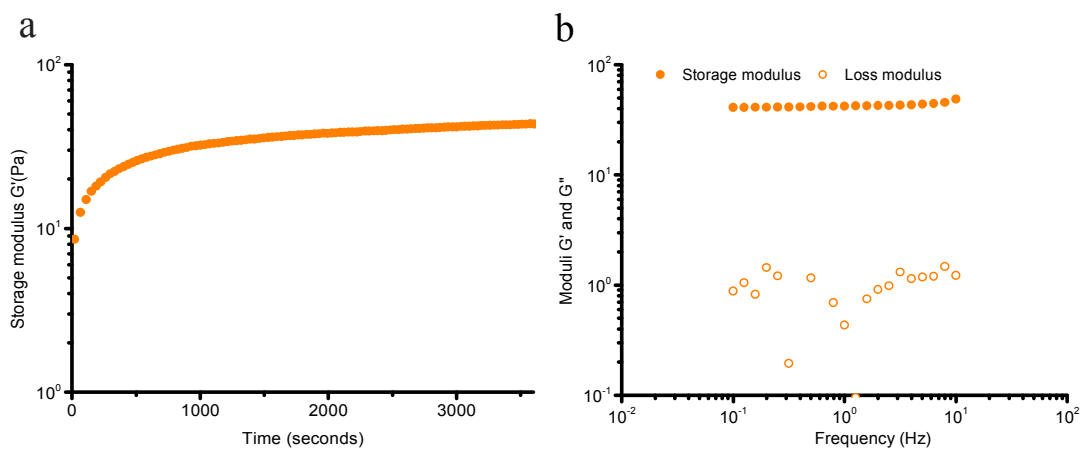

**Figure S8** Rheology measurements of the PIC-DNA hydrogel cross-linked with DNA LC in the presence of 10  $\mu\text{g/ml}$  BSA. a) Time evolution of the storage modulus ( $G'$ ). b)  $G'$  and  $G''$  over a range of frequencies ( $10^{-3}$  to 10 Hz). Measurements were performed at 30  $^{\circ}\text{C}$  in PBS, 10 mM  $\text{MgCl}_2$ , pH 7.4.
